# Supplementary material for: A Novel, Tumor-Induced Osteoclastogenesis Pathway Insensitive to Denosumab but Interfered by Cannabidiol
Source: PubMed Central journal article supplement (PMC6940789; doi:10.3390/ijms20246211), 2019-12-09
Supplement: ijms-20-06211-s001.pdf [file ijms-20-06211-s001.pdf]

# A Novel Tumor Induced Osteoclastogenesis Pathway Insensitive to Denosumab but Interfered by Cannabidiol

Maiko Tsuchiya<sup>1</sup>, Kou Kayamori<sup>1</sup>, Akane Wada<sup>2</sup>, Motohiro Komaki<sup>3</sup>, Yae Ohata<sup>2#</sup>, Miwako Hamagaki<sup>1</sup>, Kei Sakamoto<sup>1</sup> and Tohru Ikeda<sup>1\*</sup>

<sup>1</sup> Department of Oral Pathology, Graduate School of Medical and Dental Sciences, Tokyo Medical and Dental University, 1-5-45, Yushima, Bunkyo-ku, Tokyo 113-8549, Japan

<sup>2</sup> Department of Oral Diagnostic Pathology, Graduate School of Medical and Dental Sciences, Tokyo Medical and Dental University, 1-5-45, Yushima, Bunkyo-ku, Tokyo 113-8549, Japan

<sup>3</sup> Department of Highly Advanced Stomatology (Periodontology), Graduate School of Dentistry, Kanagawa Dental University, 3-31-6 Tsuruya-cho, Kanagawa-ku, Yokosuka-city, Kanagawa 221-0835, Japan

\* Correspondence: [tohrupth.mpa@tmd.ac.jp](mailto:tohrupth.mpa@tmd.ac.jp) Tel.: +81-3-5803-5451

# Present address: Department of Medical Biochemistry and Microbiology, Uppsala University, Box 582, SE-75123 Uppsala, Sweden

## Supplementary Information

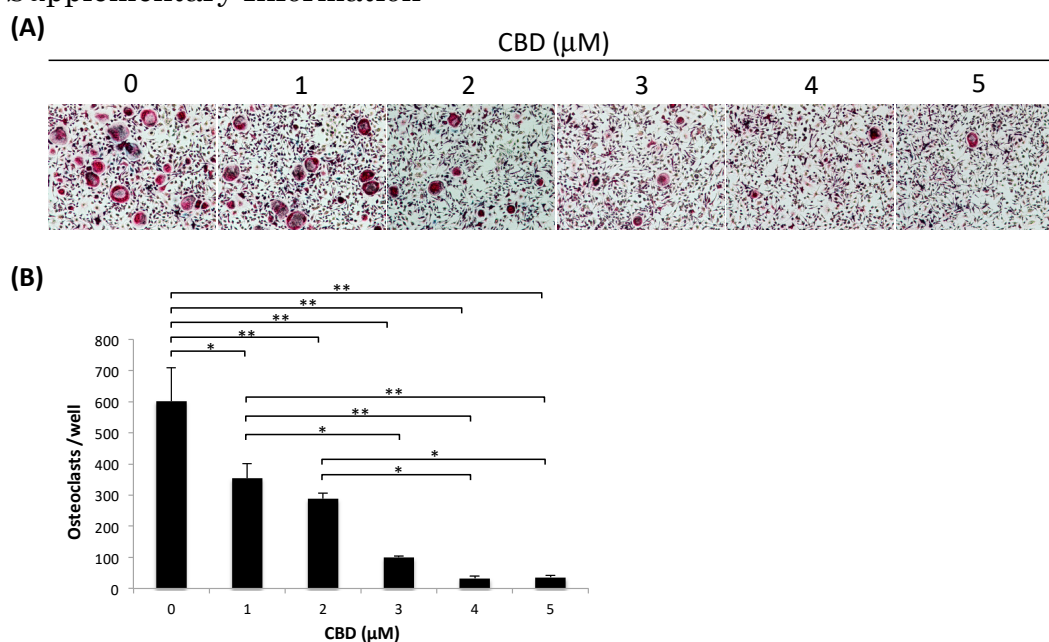

**Figure S1.** Optimization of CBD concentrations to inhibit osteoclastogenesis induced by the coculture. (A) Representative views of TRAP staining 4 days after the application of each concentration of CBD to a coculture of OPCs and 3A cells. (B) Quantitative data on the number of induced osteoclasts. Values are the mean  $\pm$  SEM of 3 wells. Values are the mean  $\pm$  SEM of 3 wells. \*\* $P < 0.001$ , \* $P < 0.05$  (one-way ANOVA with the Tukey-Kramer method).

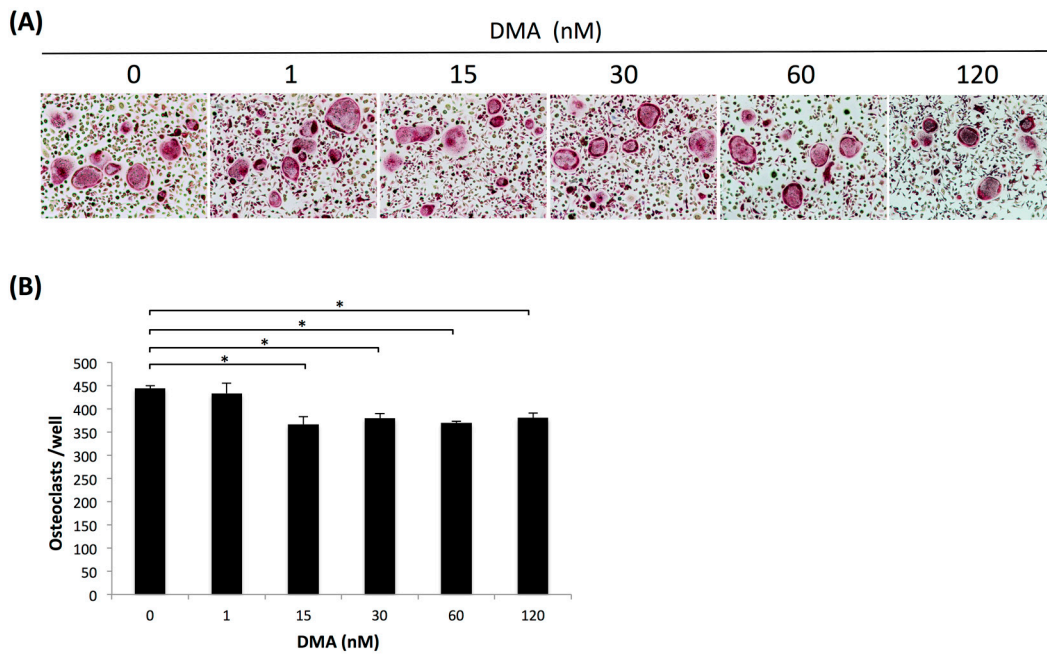

**Figure S2.** Optimization of DMA concentrations to inhibit osteoclastogenesis induced by the coculture. (A) Representative views of TRAP staining 4 days after the application of each concentration of DMA to a coculture of OPCs and 3A cells. (B) Quantitative data on the number of induced osteoclasts. Values are the mean  $\pm$  SEM of 3 wells. \* $P < 0.05$  significantly different from that without the application of DMA (one-way ANOVA with the Tukey-Kramer method).

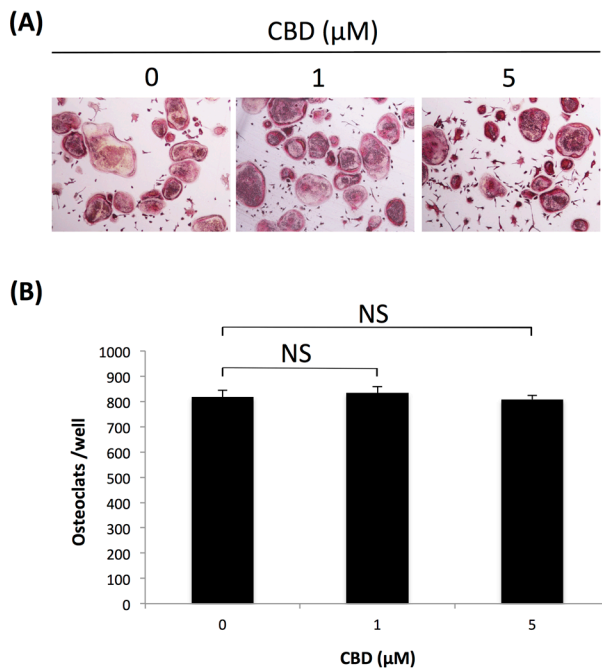

**Figure S3.** Effects of CBD on osteoclastogenesis induced from OPCs by RANKL. (A) Representative views of TRAP staining 4 days after the application of each concentration of CBD to OPCs further treated with

100 ng/mL of RANKL. (B) Quantitative data on the number of induced osteoclasts. Values are the mean  $\pm$  SEM of 3 wells. NS: not significant (one-way ANOVA with the Tukey-Kramer method)

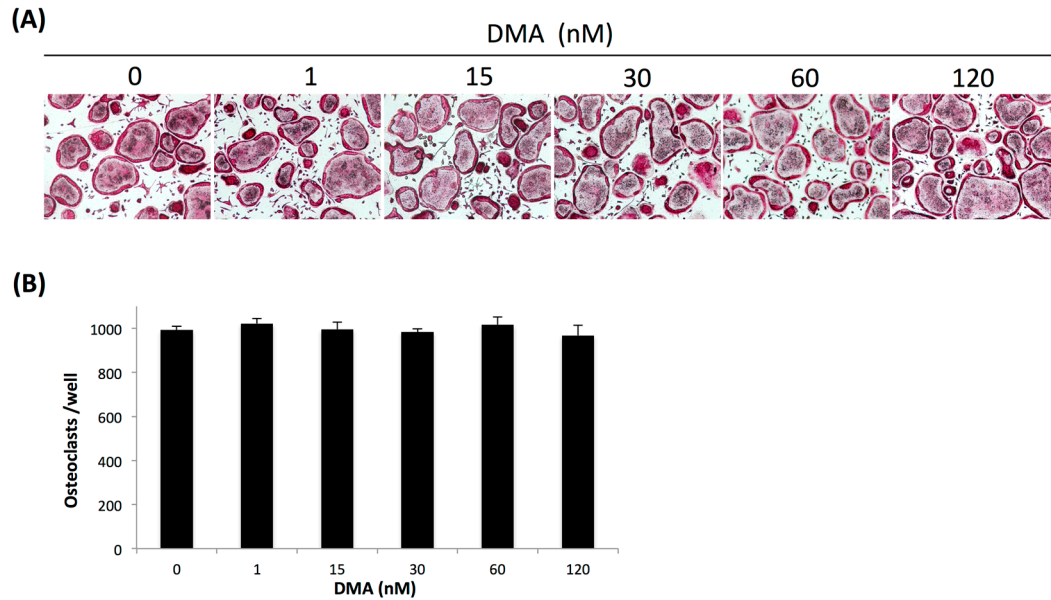

**Figure S4.** Effects of DMA on osteoclastogenesis induced from OPCs by RANKL. (A) Representative views of TRAP staining 4 days after the application of each concentration of DMA to OPCs further treated with 100 ng/mL of RANKL. (B) Quantitative data on the number of induced osteoclasts. Values are the mean  $\pm$  SEM of 3 wells. No significant difference was observed in the number of osteoclasts (one-way ANOVA with the Tukey-Kramer method).
